# Supplementary material
Source: Springer Nature journal article supplement (https://www.springermedizin.de/resource/supplementary/10194_2013_305_MOESM1_ESM.pdf/9422656)

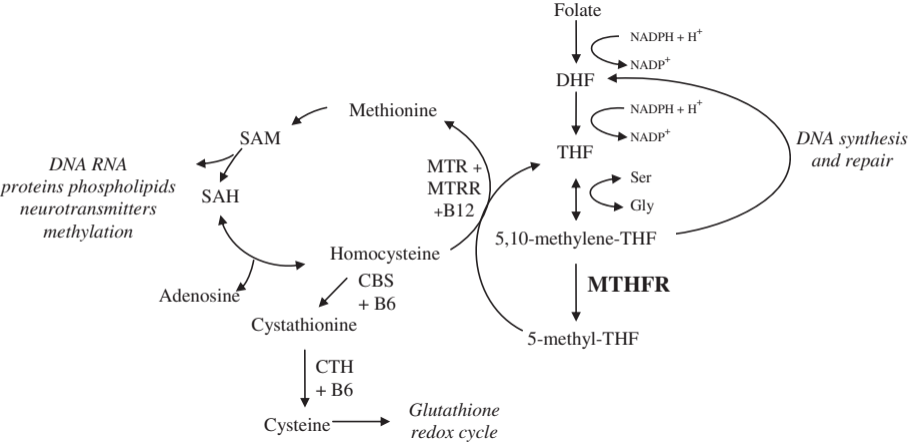

Supplement: MOESM1 [file 9422656]
